# Supplementary material for: Overcoming CT Registration Failures in Robotic Spine Surgery: A Lateral Fiducial Positioning Technique for Obese Patients
Source: Research Square preprint supplement (doi:10.21203/rs.3.rs-7253011/v1), 2025-08-17
Supplement: Supplementary file 1 [file 481db39ee21b00e704a4c854.docx]

**Supplementary Material (S1)**

**Implementation Protocol: Lateral Fiducial Positioning Technique for Obese Patients**

**1. PREOPERATIVE PREPARATION**

**1.1 Patient Assessment Checklist**

- [ ] BMI >40 kg/m² confirmed and documented
- [ ] Preoperative imaging reviewed for anatomical variations
- [ ] Cardiovascular and respiratory optimization completed
- [ ] Anesthesia team briefed on obesity-specific considerations

**1.2 Equipment Verification**

**Required Equipment:**

- [ ] MazorX Stealth Edition robotic system (calibrated)
- [ ] O-arm O2 surgical imaging system
- [ ] Bariatric spine table (>272 kg capacity, e.g., Allen Advance Table)
- [ ] Star-marker fiducial
- [ ] Extended-length robotic instruments
- [ ] Additional padding materials for pressure point management

**1.3 Team Briefing Protocol**

**Key Discussion Points:**

- Confirm Scan-and-Plan workflow approach
- Review potential for lateral marker repositioning based on patient anatomy
- Establish contingency plans for registration failure
- Ensure all team members understand lateral positioning technique

**2. PATIENT POSITIONING FOR OBESE PATIENTS**

**2.1 Anesthetic Considerations**

**Critical Safety Points:**

- **Intubation:** Always perform in supine position before turning
- **Monitoring:** Anticipate hemodynamic changes post-proning
- **Ventilation:** Prepare for increased airway pressures and decreased compliance
- **Access:** Secure multiple large-bore IV lines before positioning

**2.2 Prone Positioning Protocol**

**Step-by-Step Approach:**

1. **Table Configuration**
   - Use open-frame spine table with abdomen-free positioning
   - Ensure table weight capacity >272 kg
   - Position gel rolls appropriately for chest and pelvis support
2. **Pressure Point Management**
   - Apply extra padding to all bony prominences
   - Use gel pads for extended procedures
   - Monitor skin integrity throughout procedure
3. **Arm Positioning by Spinal Level**
   - **Upper/mid-thoracic:** Arms positioned at sides
   - **Lower thoracic/lumbar:** Arms overhead with comprehensive gel padding
   - Avoid excessive abduction to prevent brachial plexus injury
4. **Physiological Optimization**
   - Ensure abdomen hangs freely to minimize intra-abdominal pressure
   - Avoid excessive compression of chest or pelvis
   - Confirm adequate ventilation after final positioning

**3. ROBOTIC SYSTEM SETUP AND OPTIMIZATION**

**3.1 Equipment Positioning Strategy**

**3.1.1 Robot Docking for Obese Patients**

- **Base Position:** Place as caudally as possible on operative side
- **Clearance Verification:** Ensure adequate space for O-arm full rotation
- **Reach Testing:** Perform "full arm stretch test" to most cranial instrumented level
- **Stability Check:** Verify robot base stability before sterile draping

**3.1.2 O-Arm Positioning**

- **Initial Setup:** Center patient in gantry opening for 2D scout imaging
- **Collision Prevention:** Verify clearance from robot, table, and patient throughout rotation
- **Positioning Flexibility:** Ensure O-arm can move cranial/caudal to optimize coverage

**3.2 Pre-Draping Safety Verification**

**Critical Checkpoints:**

- [ ] Robot reaches all planned instrumentation levels
- [ ] O-arm completes full 360° rotation without obstruction
- [ ] Emergency access paths remain unobstructed
- [ ] All team members can move freely around patient

**4. ADVANCED SCAN ACQUISITION PROTOCOLS**

**4.1 Scout Image Assessment for Lateral Positioning Decision**

**2D Scout Image Protocol:**

1. **Obtain Orthogonal Views:** AP and lateral scout images
2. **Assess Marker Visibility:** Confirm all 4 radio-opaque beads visible in both planes
3. **Evaluate Coverage:** Verify surgical levels and fiducial marker within field-of-view

**Decision Algorithm (as detailed in Methods):**

- **Standard positioning** if adequate visualization achieved
- **Lateral positioning** if fiducial marker beads not clearly visible in both views

**4.2 Lateral Positioning Implementation**

**When Standard Positioning Fails:**

1. **Problem Recognition:** Combined patient AP diameter + marker height exceeds 15 cm sagittal FOV
2. **Solution Execution:** Reposition marker laterally along patient's flank
3. **Optimal Placement:** Move marker as far laterally as safely possible while maintaining stability
4. **O-arm Adjustment:** Center O-arm between spine midline and lateral marker position

**Technical Advantages:**

- Utilizes O-arm's 40 cm lateral FOV while respecting 15 cm sagittal limitation
- Maintains both spinal anatomy and fiducial marker within scan volume
- Eliminates field-of-view coverage failures

**4.3 Scan Optimization Parameters**

**Radiation Settings (as specified in Methods):**

- kVp: 120.00
- mAs: 186.25
- Dose selection: Low to Medium (avoid High setting to prevent marker oversaturation)

**Field-of-View Selection:**

- **Initial attempt:** 20 cm diameter × 15 cm height
- **If lateral positioning used:** 40 cm diameter × 15 cm height

**5. TROUBLESHOOTING GUIDE**

**5.1 Common Registration Failures and Solutions**

| **Problem** | **Cause** | **Solution** | **Prevention** |
| --- | --- | --- | --- |
| Marker not detected | Oversaturation/overexposure | Re-scan with lower dose | Use Low-Medium settings initially |
| Marker outside scan volume | Field-of-view limitation | Implement lateral positioning | Better scout image assessment |
| Poor image quality | Photon starvation in large patients | Accept moderate noise if marker visible | Balance dose vs. marker visibility |
| Registration timeout | Software/hardware issue | System restart and re-register | Ensure proper system calibration |

**5.2 Re-scan Decision Protocol**

**Indications for Re-scan:**

- Fiducial marker not visible or oversaturated
- Insufficient anatomical coverage
- Significant motion artifacts
- Automatic registration software failure

**Re-scan Approach:**

1. **First reattempt:** Adjust radiation settings and re-scan
2. **Second reattempt:** Modify positioning (implement lateral technique if not used) and re-scan
3. **After 2 failures:** Consider conversion to fluoroscopic-guided or freehand technique

**Maximum recommendation:** 2 scan attempts before workflow modification

**Note:** This protocol should be used in conjunction with the Methods section of the main manuscript, which provides the scientific rationale, decision criteria, and outcome measures for the lateral fiducial positioning technique.
